# Supplementary material
Source: ML conference proceedings conference paper supplement (https://openreview.net/forum?id=uVG_7x41bN)
Supplement: supplementary_material [file attachment]

# L<sup>A</sup>T<sub>E</sub>X Author Guidelines for CVPR Proceedings

Anonymous CVPR submission

Paper ID \*\*\*\*\*

## Abstract

*The ABSTRACT is to be in fully justified italicized text, at the top of the left-hand column, below the author and affiliation information. Use the word “Abstract” as the title, in 12-point Times, boldface type, centered relative to the column, initially capitalized. The abstract is to be in 10-point, single-spaced type. Leave two blank lines after the Abstract, then begin the main text. Look at previous CVPR abstracts to get a feel for style and length.*

## 1. Introduction

Please follow the steps outlined below when submitting your manuscript to the IEEE Computer Society Press. This style guide now has several important modifications (for example, you are no longer warned against the use of sticky tape to attach your artwork to the paper), so all authors should read this new version.

### 1.1. Language

All manuscripts must be in English.

### 1.2. Dual submission

Please refer to the author guidelines on the CVPR 2023 web page for a discussion of the policy on dual submissions.

### 1.3. Paper length

Papers, excluding the references section, must be no longer than eight pages in length. The references section will not be included in the page count, and there is no limit on the length of the references section. For example, a paper of eight pages with two pages of references would have a total length of 10 pages. **There will be no extra page charges for CVPR 2023.**

Overlength papers will simply not be reviewed. This includes papers where the margins and formatting are deemed to have been significantly altered from those laid down by this style guide. Note that this L<sup>A</sup>T<sub>E</sub>X guide already sets figure captions and references in a smaller font. The reason

such papers will not be reviewed is that there is no provision for supervised revisions of manuscripts. The reviewing process cannot determine the suitability of the paper for presentation in eight pages if it is reviewed in eleven.

### 1.4. The ruler

The L<sup>A</sup>T<sub>E</sub>X style defines a printed ruler which should be present in the version submitted for review. The ruler is provided in order that reviewers may comment on particular lines in the paper without circumlocution. If you are preparing a document using a non-L<sup>A</sup>T<sub>E</sub>X document preparation system, please arrange for an equivalent ruler to appear on the final output pages. The presence or absence of the ruler should not change the appearance of any other content on the page. The camera-ready copy should not contain a ruler. (L<sup>A</sup>T<sub>E</sub>X users may use options of cvpr.sty to switch between different versions.)

Reviewers: note that the ruler measurements do not align well with lines in the paper — this turns out to be very difficult to do well when the paper contains many figures and equations, and, when done, looks ugly. Just use fractional references (*e.g.*, this line is 087.5), although in most cases one would expect that the approximate location will be adequate.

### 1.5. Paper ID

Make sure that the Paper ID from the submission system is visible in the version submitted for review (replacing the “\*\*\*\*\*” you see in this document). If you are using the L<sup>A</sup>T<sub>E</sub>X template, **make sure to update paper ID in the appropriate place in the tex file.**

### 1.6. Mathematics

Please number all of your sections and displayed equations as in these examples:

$$E = m \cdot c^2 \quad (1)$$

and

$$v = a \cdot t. \quad (2)$$

It is important for readers to be able to refer to any particular equation. Just because you did not refer to it in the text

108 does not mean some future reader might not need to refer to  
109 it. It is cumbersome to have to use circumlocutions like “the  
110 equation second from the top of page 3 column 1”. (Note  
111 that the ruler will not be present in the final copy, so is not  
112 an alternative to equation numbers). All authors will benefit  
113 from reading Mermin’s description of how to write math-  
114 ematics: [http://www.pamitc.org/documents/  
115 mermin.pdf](http://www.pamitc.org/documents/mermin.pdf).

## 117 1.7. Blind review

118 Many authors misunderstand the concept of anonymiz-  
119 ing for blind review. Blind review does not mean that one  
120 must remove citations to one’s own work—in fact it is often  
121 impossible to review a paper unless the previous citations  
122 are known and available.

123 Blind review means that you do not use the words “my”  
124 or “our” when citing previous work. That is all. (But see  
125 below for tech reports.)

126 Saying “this builds on the work of Lucy Smith [1]” does  
127 not say that you are Lucy Smith; it says that you are building  
128 on her work. If you are Smith and Jones, do not say “as we  
129 show in [7]”, say “as Smith and Jones show in [7]” and at  
130 the end of the paper, include reference 7 as you would any  
131 other cited work.

132 An example of a bad paper just asking to be rejected:

133 An analysis of the frobnicatable foo filter.

134 In this paper we present a performance analysis  
135 of our previous paper [1], and show it to be infer-  
136 ior to all previously known methods. Why the  
137 previous paper was accepted without this analysis  
138 is beyond me.

139 [1] Removed for blind review

140 An example of an acceptable paper:

141 An analysis of the frobnicatable foo filter.

142 In this paper we present a performance analysis of  
143 the paper of Smith *et al.* [1], and show it to be infer-  
144 ior to all previously known methods. Why the  
145 previous paper was accepted without this analysis  
146 is beyond me.

147 [1] Smith, L and Jones, C. “The frobnicatable  
148 foo filter, a fundamental contribution to human  
149 knowledge”. Nature 381(12), 1-213.

150 If you are making a submission to another conference at  
151 the same time, which covers similar or overlapping mate-  
152 rial, you may need to refer to that submission in order to  
153 explain the differences, just as you would if you had pre-  
154 viously published related work. In such cases, include the  
155 anonymized parallel submission [?] as supplemental mate-  
156 rial and cite it as

162 [1] Authors. “The frobnicatable foo filter”, F&G  
163 2014 Submission ID 324, Supplied as supplement-  
164 al material fg324.pdf.

165 Finally, you may feel you need to tell the reader that  
166 more details can be found elsewhere, and refer them to  
167 a technical report. For conference submissions, the pa-  
168 per must stand on its own, and not *require* the reviewer  
169 to go to a tech report for further details. Thus, you may  
170 say in the body of the paper “further details may be found  
171 in [?]”. Then submit the tech report as supplemental ma-  
172 terial. Again, you may not assume the reviewers will read  
173 this material.

174 Sometimes your paper is about a problem which you  
175 tested using a tool that is widely known to be restricted to a  
176 single institution. For example, let’s say it’s 1969, you have  
177 solved a key problem on the Apollo lander, and you believe  
178 that the CVPR70 audience would like to hear about your  
179 solution. The work is a development of your celebrated  
180 1968 paper entitled “Zero-g frobnication: How being the  
181 only people in the world with access to the Apollo lander  
182 source code makes us a wow at parties”, by Zeus *et al.*

183 You can handle this paper like any other. Do not write  
184 “We show how to improve our previous work [Anonymous,  
185 1968]. This time we tested the algorithm on a lunar lander  
186 [name of lander removed for blind review]”. That would be  
187 silly, and would immediately identify the authors. Instead  
188 write the following:

189 We describe a system for zero-g frobnication.  
190 This system is new because it handles the fol-  
191 lowing cases: A, B. Previous systems [Zeus *et al.*  
192 1968] did not handle case B properly. Ours han-  
193 dles it by including a foo term in the bar integral.

194 ...

195 The proposed system was integrated with the  
196 Apollo lunar lander, and went all the way to the  
197 moon, don’t you know. It displayed the follow-  
198 ing behaviours, which show how well we solved  
199 cases A and B: ...

200 As you can see, the above text follows standard scientific  
201 convention, reads better than the first version, and does not  
202 explicitly name you as the authors. A reviewer might think  
203 it likely that the new paper was written by Zeus *et al.*, but  
204 cannot make any decision based on that guess. He or she  
205 would have to be sure that no other authors could have been  
206 contracted to solve problem B.

207 FAQ

208 **Q:** Are acknowledgements OK?

209 **A:** No. Leave them for the final copy.

210 **Q:** How do I cite my results reported in open challenges?

211 **A:** To conform with the double-blind review policy, you

216  
217  
218  
219  
220  
221  
222  
223  
224  
225  
226  
227  
228  
229  
230  
231  
232  
233  
234  
235  
236  
237  
238  
239  
240  
241  
242  
243  
244  
245  
246  
247  
248  
249  
250  
251  
252  
253  
254  
255  
256  
257  
258  
259  
260  
261  
262  
263  
264  
265  
266  
267  
268  
269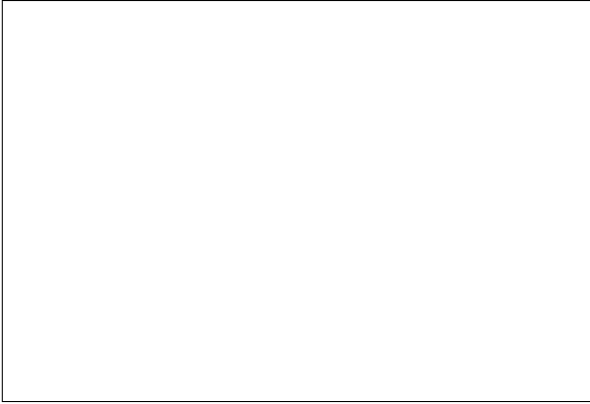

Figure 1. Example of caption. It is set in Roman so that mathematics (always set in Roman:  $B \sin A = A \sin B$ ) may be included without an ugly clash.

can report results of other challenge participants together with your results in your paper. For your results, however, you should not identify yourself and should not mention your participation in the challenge. Instead present your results referring to the method proposed in your paper and draw conclusions based on the experimental comparison to other results.

## 1.8. Miscellaneous

Compare the following:

`\conf_a$`                      *conf<sub>a</sub>*  
`\mathit{conf}_a$`              *conf<sub>a</sub>*

See The  $\TeX$ book, p165.

The space after *e.g.*, meaning “for example”, should not be a sentence-ending space. So *e.g.* is correct, *e.g.* is not. The provided `\eg` macro takes care of this.

When citing a multi-author paper, you may save space by using “et alia”, shortened to “*et al.*” (not “*et. al.*” as “*et*” is a complete word). If you use the `\etal` macro provided, then you need not worry about double periods when used at the end of a sentence as in Alpher *et al.* However, use it only when there are three or more authors. Thus, the following is correct: “Frobnication has been trendy lately. It was introduced by Alpher [?], and subsequently developed by Alpher and Fotheringham-Smythe [?], and Alpher *et al.* [?].”

This is incorrect: “... subsequently developed by Alpher *et al.* [?] ...” because reference [?] has just two authors.

## 2. Formatting your paper

All text must be in a two-column format. The total allowable size of the text area is  $6\frac{7}{8}$  inches (17.46 cm) wide by  $8\frac{7}{8}$  inches (22.54 cm) high. Columns are to be  $3\frac{1}{4}$  inches (8.25 cm) wide, with a  $\frac{5}{16}$  inch (0.8 cm) space between them. The

main title (on the first page) should begin 1 inch (2.54 cm) from the top edge of the page. The second and following pages should begin 1 inch (2.54 cm) from the top edge. On all pages, the bottom margin should be  $1\frac{1}{8}$  inches (2.86 cm) from the bottom edge of the page for  $8.5 \times 11$ -inch paper; for A4 paper, approximately  $1\frac{5}{8}$  inches (4.13 cm) from the bottom edge of the page.

### 2.1. Margins and page numbering

All printed material, including text, illustrations, and charts, must be kept within a print area  $6\frac{7}{8}$  inches (17.46 cm) wide by  $8\frac{7}{8}$  inches (22.54 cm) high. Page numbers should be in the footer, centered and  $\frac{3}{4}$  inches from the bottom of the page. The review version should have page numbers, yet the final version submitted as camera ready should not show any page numbers. The  $\LaTeX$  template takes care of this when used properly.

### 2.2. Type style and fonts

Wherever Times is specified, Times Roman may also be used. If neither is available on your word processor, please use the font closest in appearance to Times to which you have access.

**MAIN TITLE.** Center the title  $1\frac{3}{8}$  inches (3.49 cm) from the top edge of the first page. The title should be in Times 14-point, boldface type. Capitalize the first letter of nouns, pronouns, verbs, adjectives, and adverbs; do not capitalize articles, coordinate conjunctions, or prepositions (unless the title begins with such a word). Leave two blank lines after the title.

**AUTHOR NAME(s) and AFFILIATION(s)** are to be centered beneath the title and printed in Times 12-point, non-boldface type. This information is to be followed by two blank lines.

The **ABSTRACT** and **MAIN TEXT** are to be in a two-column format.

**MAIN TEXT.** Type main text in 10-point Times, single-spaced. Do NOT use double-spacing. All paragraphs should be indented 1 pica (approx.  $\frac{1}{6}$  inch or 0.422 cm). Make sure your text is fully justified—that is, flush left and flush right. Please do not place any additional blank lines between paragraphs.

Figure and table captions should be 9-point Roman type as in [?]. Short captions should be centred.

Callouts should be 9-point Helvetica, non-boldface type. Initially capitalize only the first word of section titles and first-, second-, and third-order headings.

**FIRST-ORDER HEADINGS.** (For example, **1. Introduction**) should be Times 12-point boldface, initially capitalized, flush left, with one blank line before, and one blank line after.

**SECOND-ORDER HEADINGS.** (For example, **1.1. Database elements**) should be Times 11-point boldface,

270  
271  
272  
273  
274  
275  
276  
277  
278  
279  
280  
281  
282  
283  
284  
285  
286  
287  
288  
289  
290  
291  
292  
293  
294  
295  
296  
297  
298  
299  
300  
301  
302  
303  
304  
305  
306  
307  
308  
309  
310  
311  
312  
313  
314  
315  
316  
317  
318  
319  
320  
321  
322  
323

324  
325  
326  
327  
328  
329  
330  
331  
332  
333  
334  
335  
336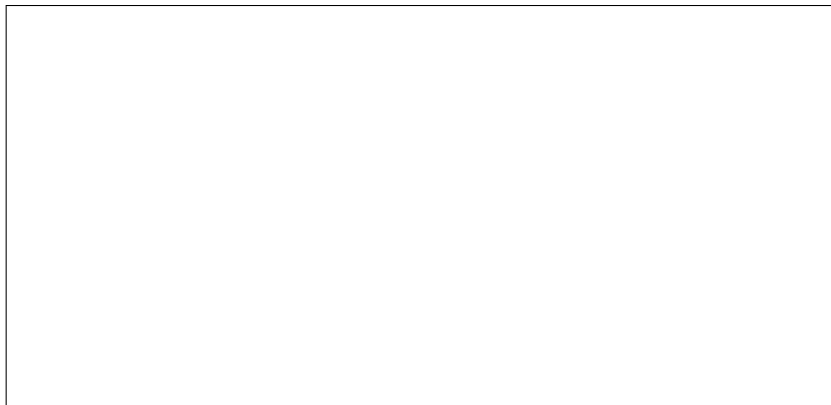

(a) An example of a subfigure.

378  
379  
380  
381  
382  
383  
384  
385  
386  
387  
388  
389  
390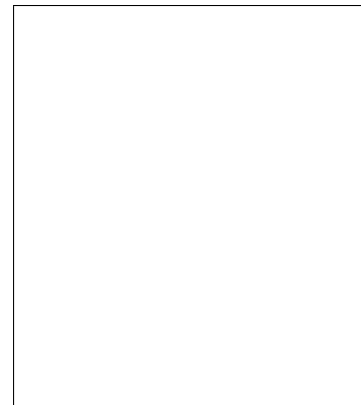

(b) Another example of a subfigure.

Figure 2. Example of a short caption, which should be centered.

337  
338  
339  
340  
341  
342  
343  
344  
345  
346

initially capitalized, flush left, with one blank line before, and one after. If you require a third-order heading (we discourage it), use 10-point Times, boldface, initially capitalized, flush left, preceded by one blank line, followed by a period and your text on the same line.

### 2.3. Footnotes

Please use footnotes<sup>1</sup> sparingly. Indeed, try to avoid footnotes altogether and include necessary peripheral observations in the text (within parentheses, if you prefer, as in this sentence). If you wish to use a footnote, place it at the bottom of the column on the page on which it is referenced. Use Times 8-point type, single-spaced.

### 2.4. Cross-references

For the benefit of author(s) and readers, please use the

```
\cref{...}
```

command for cross-referencing to figures, tables, equations, or sections. This will automatically insert the appropriate label alongside the cross-reference as in this example:

To see how our method outperforms previous work, please see ?? and ?. It is also possible to refer to multiple targets as once, *e.g.* to ??. You may also return to ? or look at ?.

If you do not wish to abbreviate the label, for example at the beginning of the sentence, you can use the

```
\Cref{...}
```

command. Here is an example:

?? is also quite important.

<sup>1</sup>This is what a footnote looks like. It often distracts the reader from the main flow of the argument.

377

| Method | Frobnability           |
|--------|------------------------|
| Theirs | Frumpy                 |
| Yours  | Frobbly                |
| Ours   | Makes one's heart Frob |

Table 1. Results. Ours is better.

347  
348349  
350351  
352353  
354355  
356357  
358359  
360361  
362363  
364365  
366367  
368369  
370371  
372373  
374375  
376

### 2.5. References

List and number all bibliographical references in 9-point Times, single-spaced, at the end of your paper. When referenced in the text, enclose the citation number in square brackets, for example [?]. Where appropriate, include page numbers and the name(s) of editors of referenced books. When you cite multiple papers at once, please make sure that you cite them in numerical order like this [?, ?, ?, ?, ?]. If you use the template as advised, this will be taken care of automatically.

### 2.6. Illustrations, graphs, and photographs

All graphics should be centered. In  $\LaTeX$ , avoid using the `center` environment for this purpose, as this adds potentially unwanted whitespace. Instead use

```
\centering
```

at the beginning of your figure. Please ensure that any point you wish to make is resolvable in a printed copy of the paper. Resize fonts in figures to match the font in the body text, and choose line widths that render effectively in print. Readers (and reviewers), even of an electronic copy, may choose to print your paper in order to read it. You cannot insist that they do otherwise, and therefore must not assume that they can zoom in to see tiny details on a graphic.

When placing figures in  $\LaTeX$ , it's almost always best to use `\includegraphics`, and to specify the figure width as a multiple of the line width as in the example below

391  
392  
393  
394  
395  
396  
397  
398  
399  
400401  
402403  
404405  
406407  
408409  
410411  
412413  
414415  
416417  
418419  
420421  
422423  
424425  
426427  
428429  
430

431

```
432 \usepackage{graphicx} ...
433 \includegraphics[width=0.8\linewidth]
434 {myfile.pdf}
435
```

## 436 2.7. Color

437 Please refer to the author guidelines on the CVPR 2023  
438 web page for a discussion of the use of color in your docu-  
439 ment.

440 If you use color in your plots, please keep in mind that a  
441 significant subset of reviewers and readers may have a color  
442 vision deficiency; red-green blindness is the most frequent  
443 kind. Hence avoid relying only on color as the discrimina-  
444 tive feature in plots (such as red vs. green lines), but add a  
445 second discriminative feature to ease disambiguation.  
446

## 447 3. Final copy

448 You must include your signed IEEE copyright release  
449 form when you submit your finished paper. We MUST have  
450 this form before your paper can be published in the proceed-  
451 ings.  
452

453 Please direct any questions to the production editor in  
454 charge of these proceedings at the IEEE Computer Soci-  
455 ety Press: [https://www.computer.org/about/](https://www.computer.org/about/contact)  
456 [contact](https://www.computer.org/about/contact).  
457  
458  
459  
460  
461  
462  
463  
464  
465  
466  
467  
468  
469  
470  
471  
472  
473  
474  
475  
476  
477  
478  
479  
480  
481  
482  
483  
484  
485

486  
487  
488  
489  
490  
491  
492  
493  
494  
495  
496  
497  
498  
499  
500  
501  
502  
503  
504  
505  
506  
507  
508  
509  
510  
511  
512  
513  
514  
515  
516  
517  
518  
519  
520  
521  
522  
523  
524  
525  
526  
527  
528  
529  
530  
531  
532  
533  
534  
535  
536  
537  
538  
539
