# Supplementary material
Source: ML conference proceedings conference paper supplement (https://openreview.net/forum?id=uVG_7x41bN)

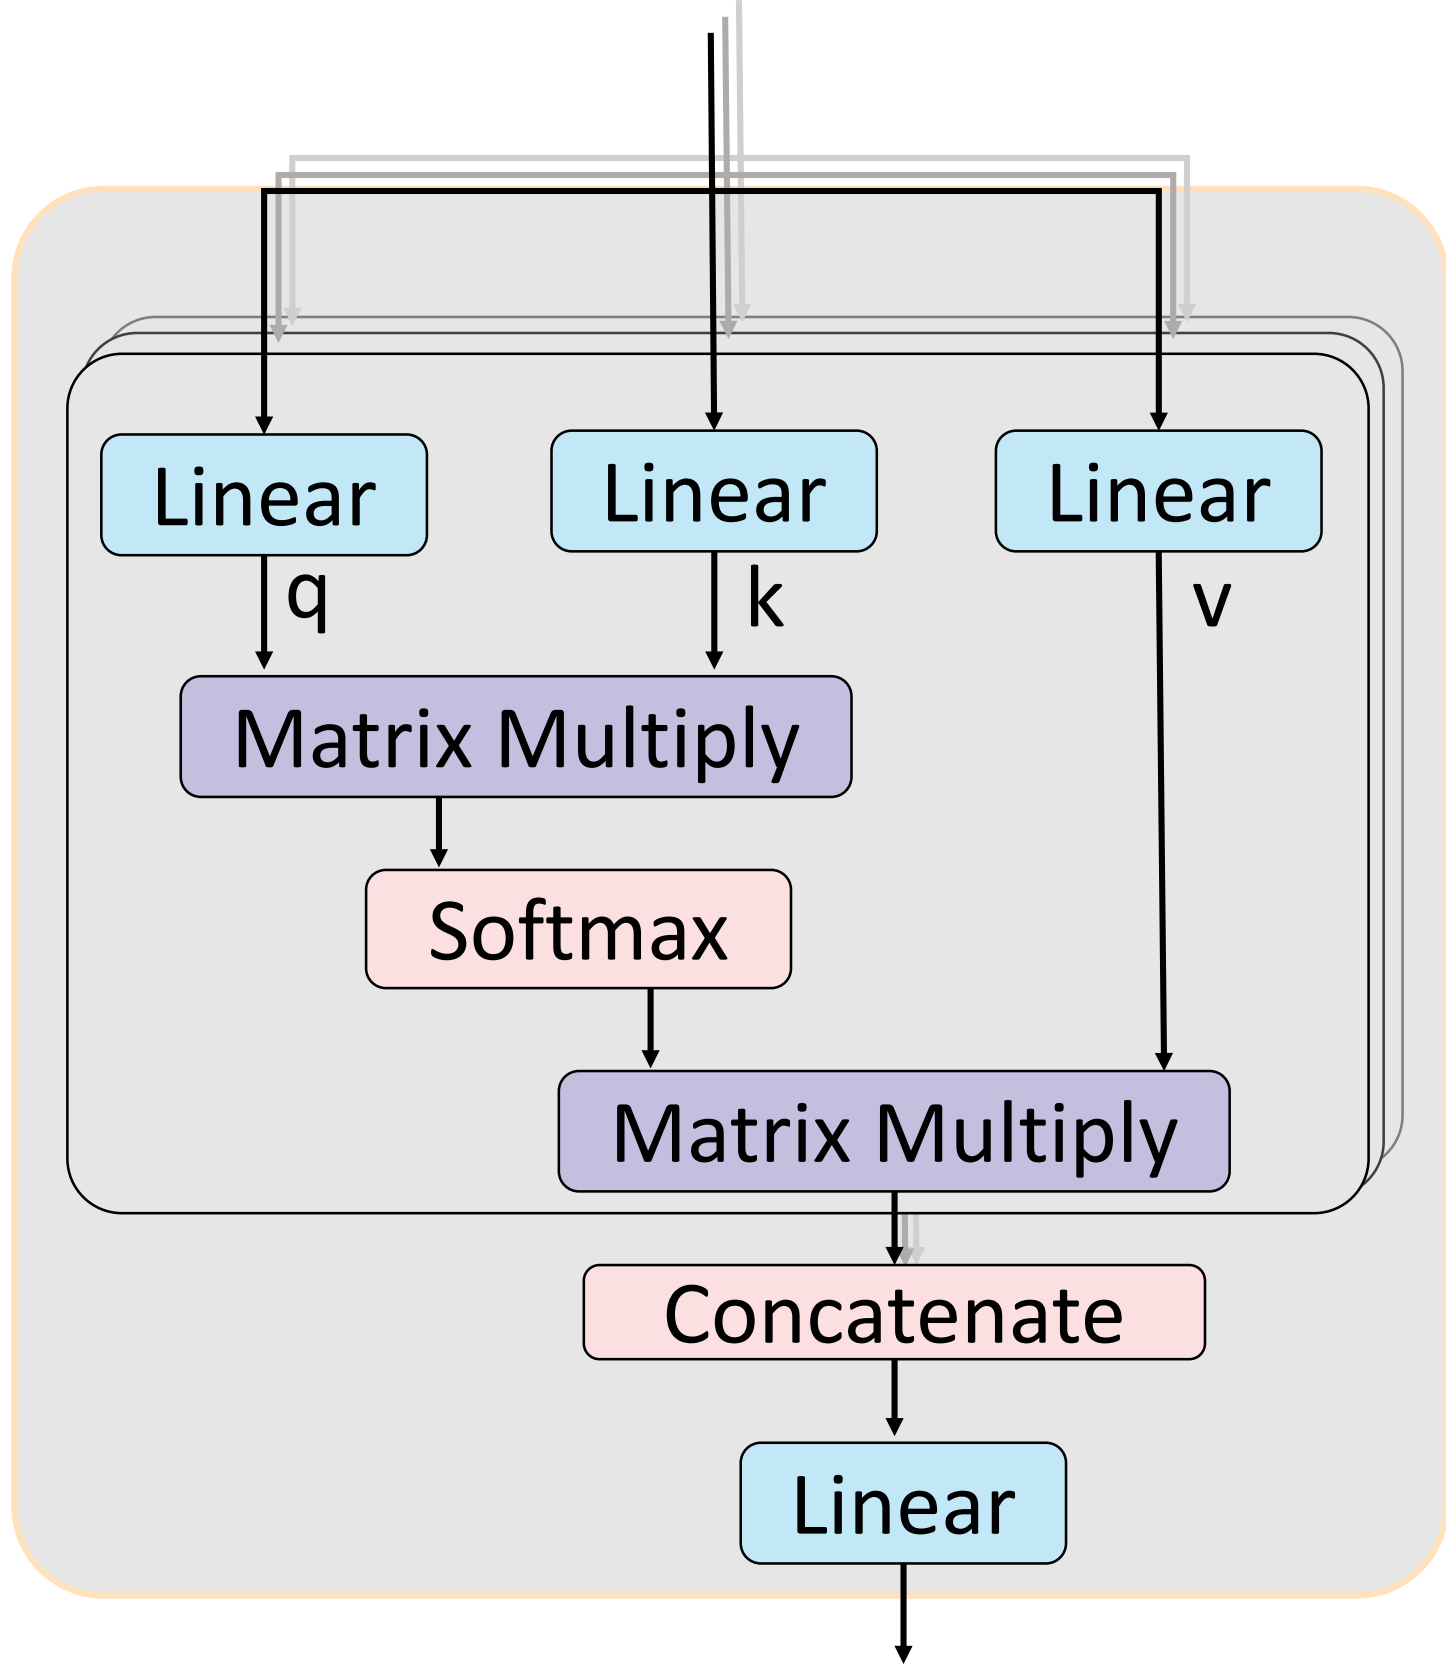

Supplement: supplementary_material [file attachment]

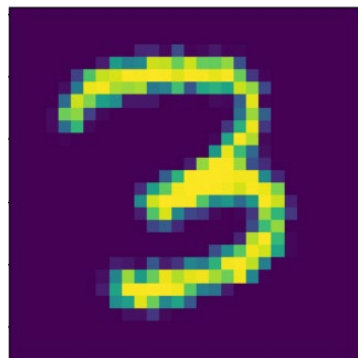

GE-ViT

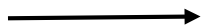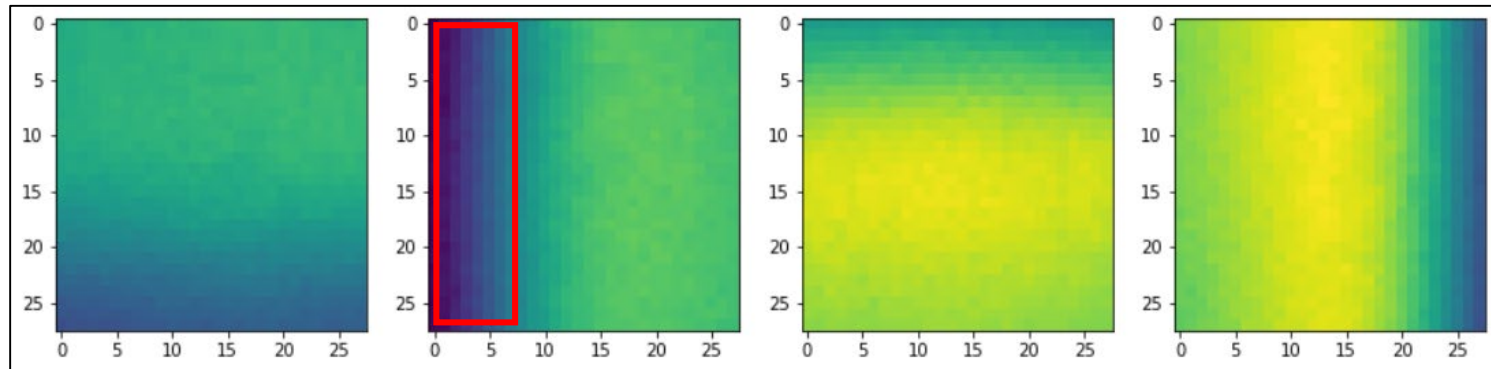

Rotation

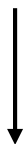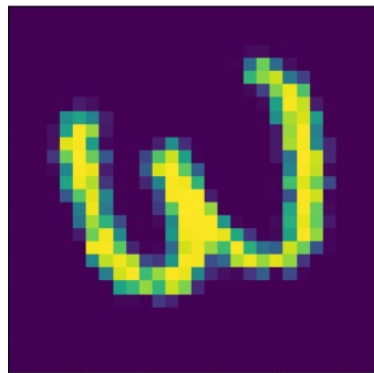

GE-ViT

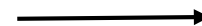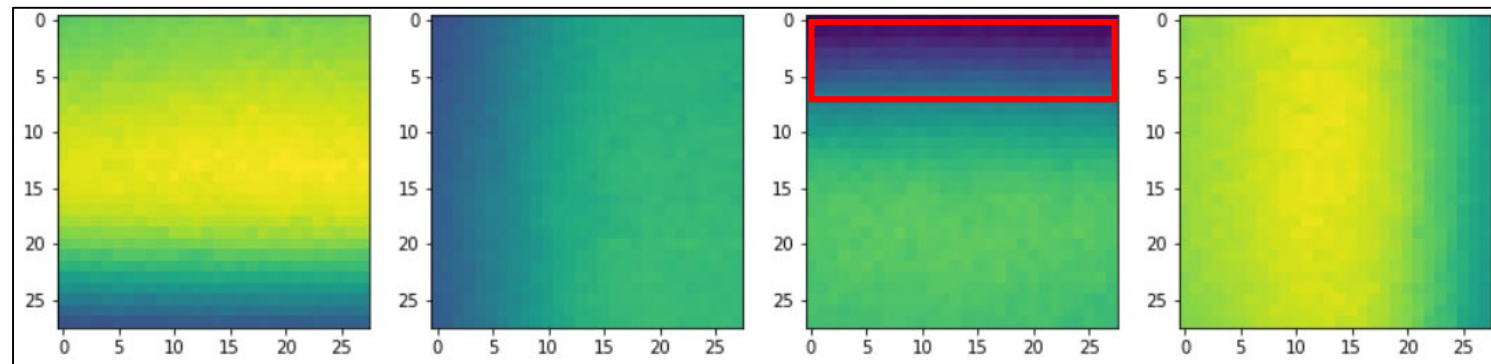

Rotation + Cyclic permutation

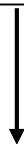

Supplement: supplementary_material [file attachment]

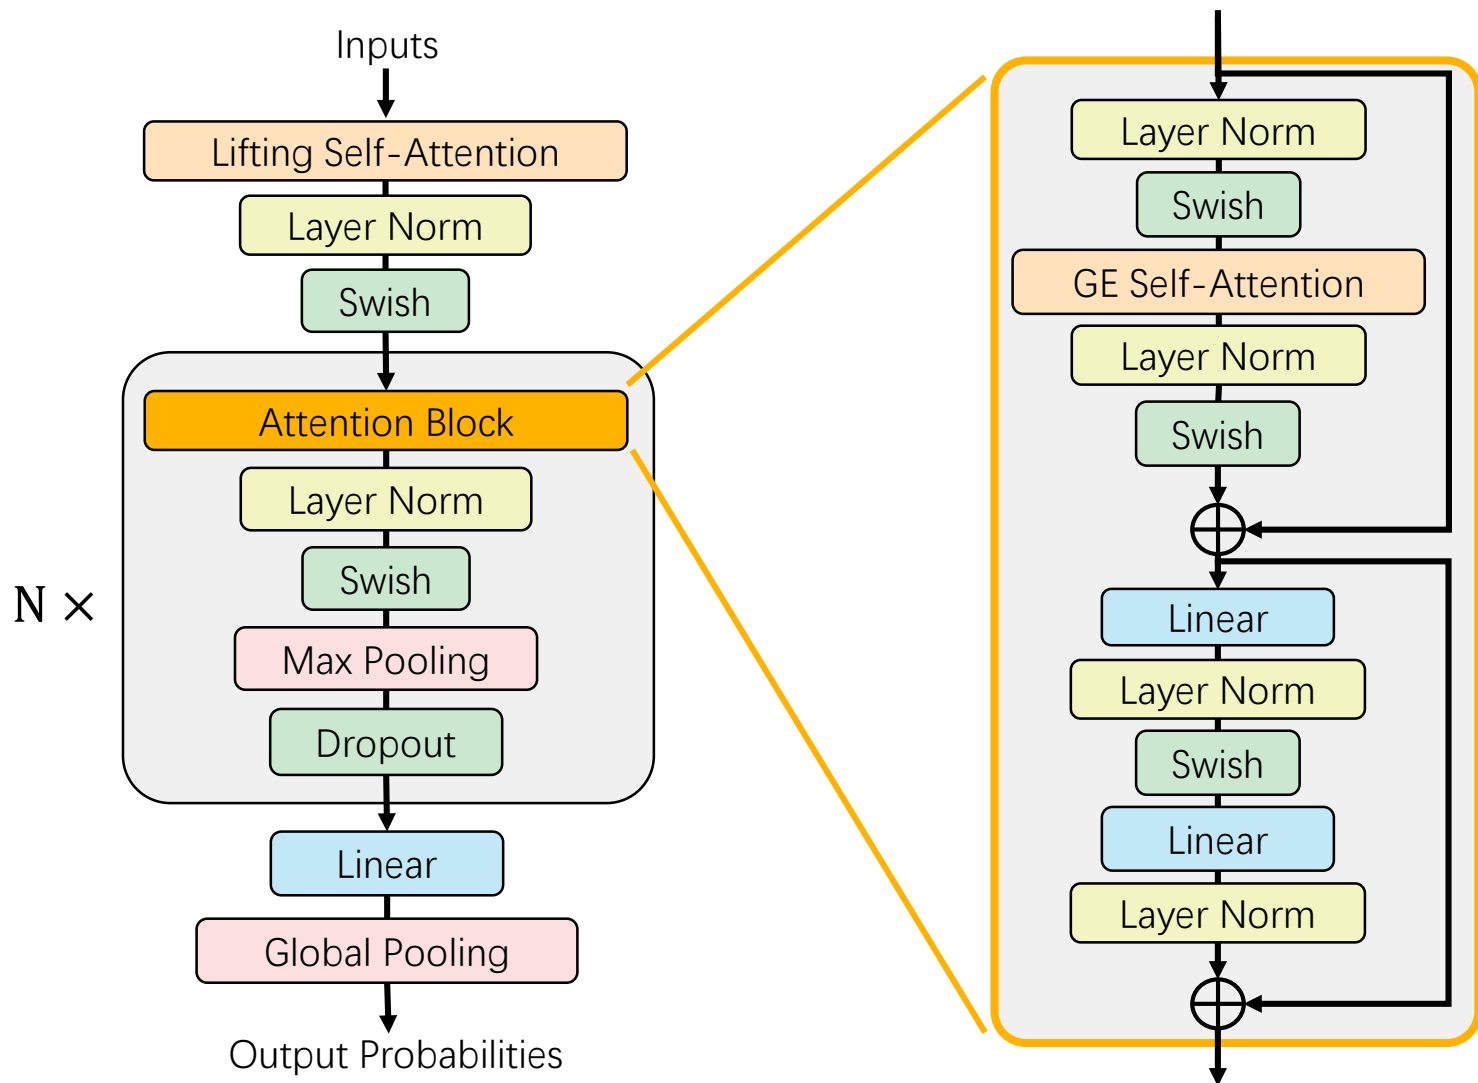

Supplement: supplementary_material [file attachment]

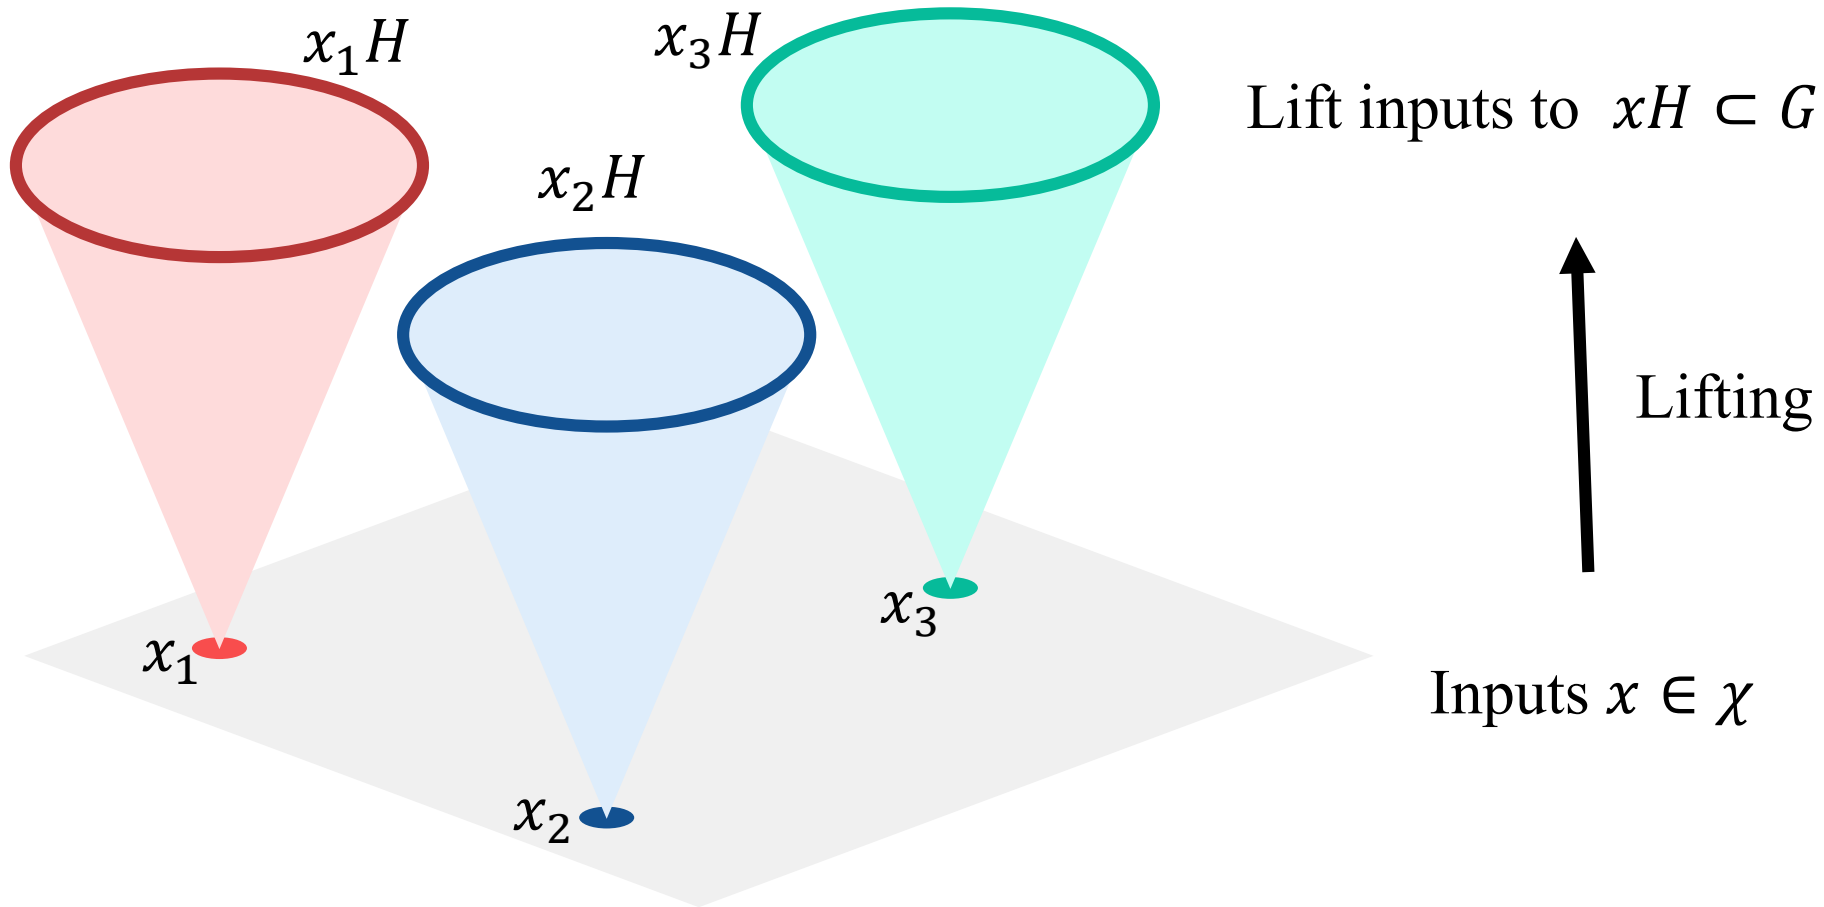

Supplement: supplementary_material [file attachment]

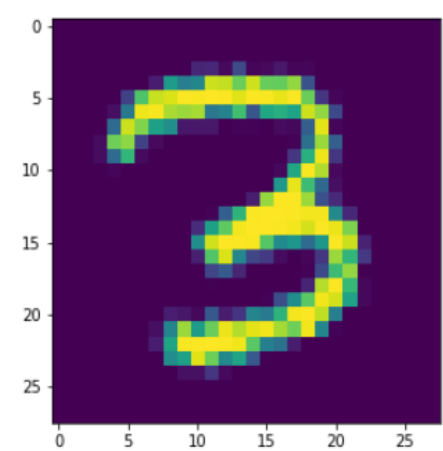

GE-ViT

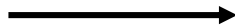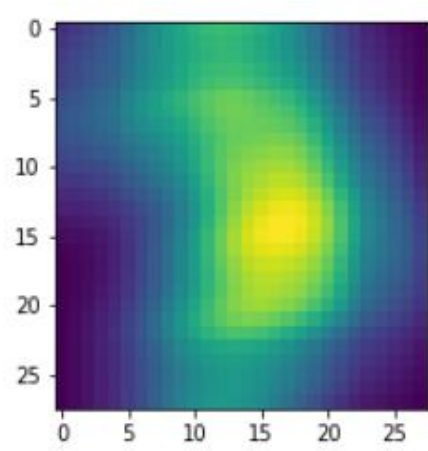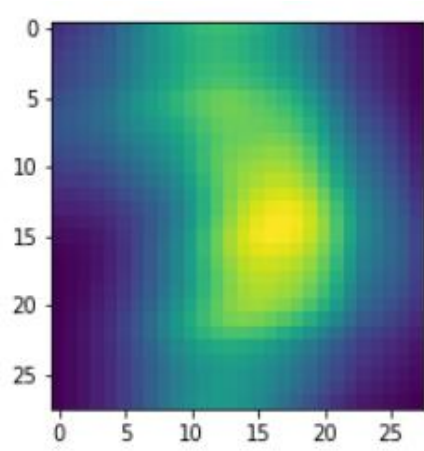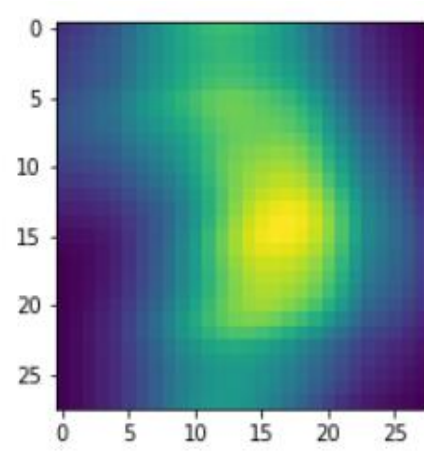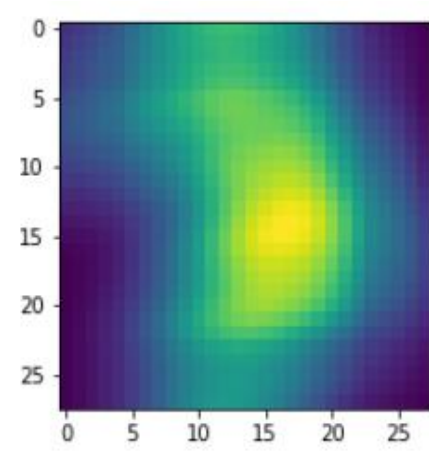

Translation

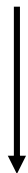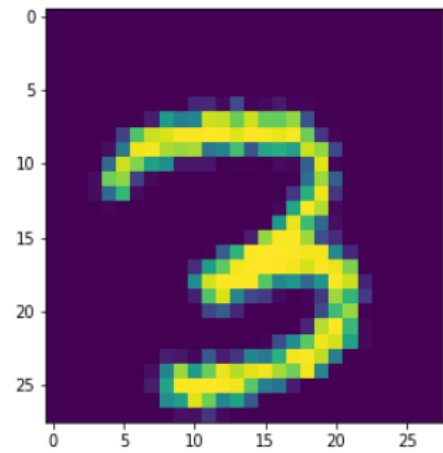

GE-ViT

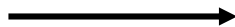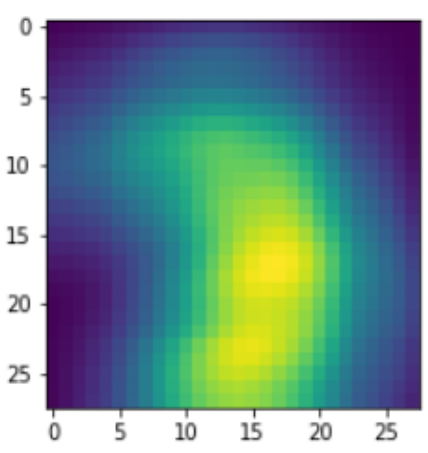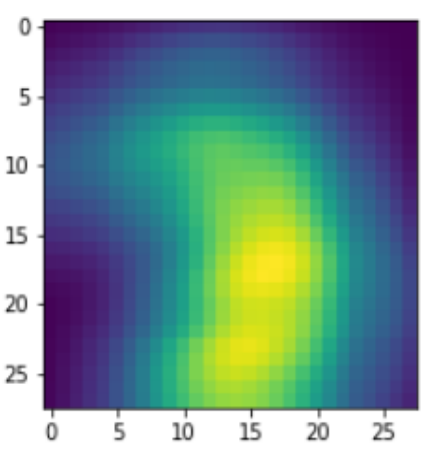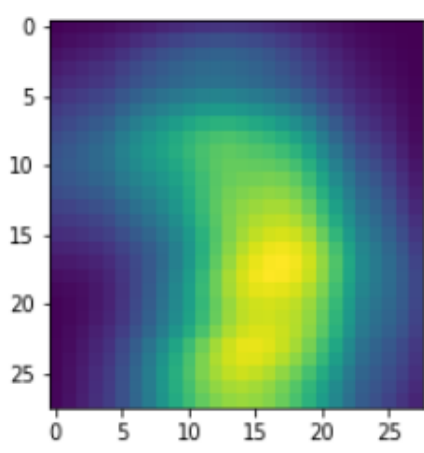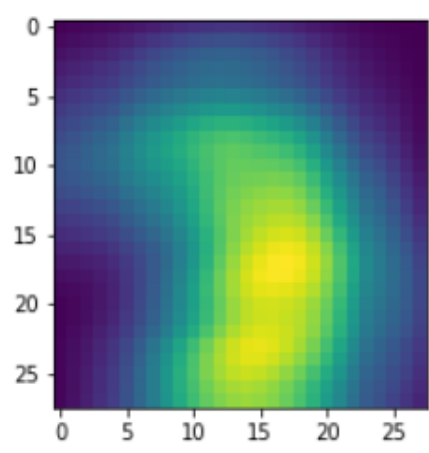

Translation

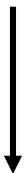

Supplement: supplementary_material [file attachment]

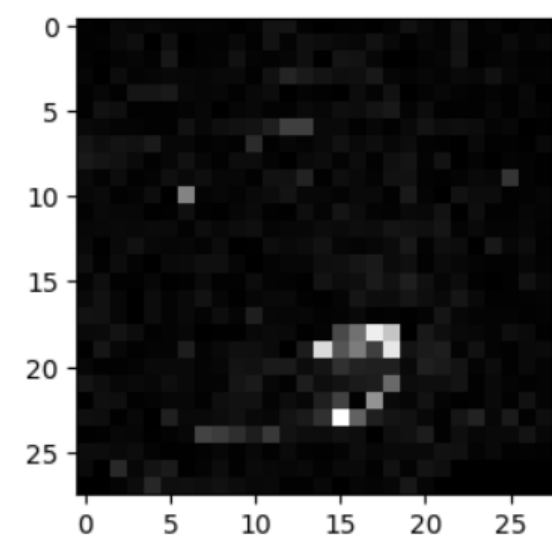

$3.9\text{e-}05$

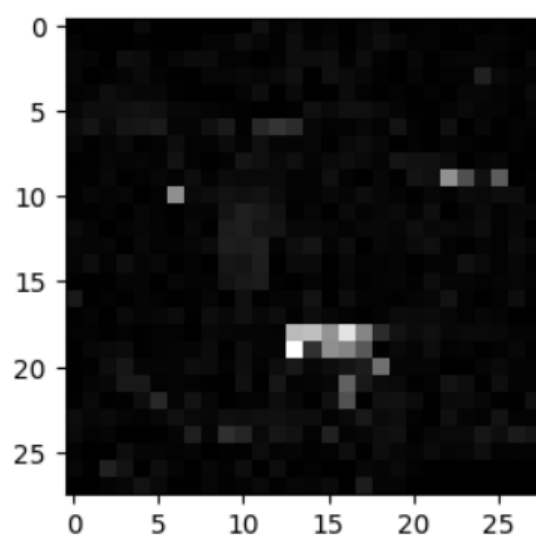

$4.2\text{e-}05$

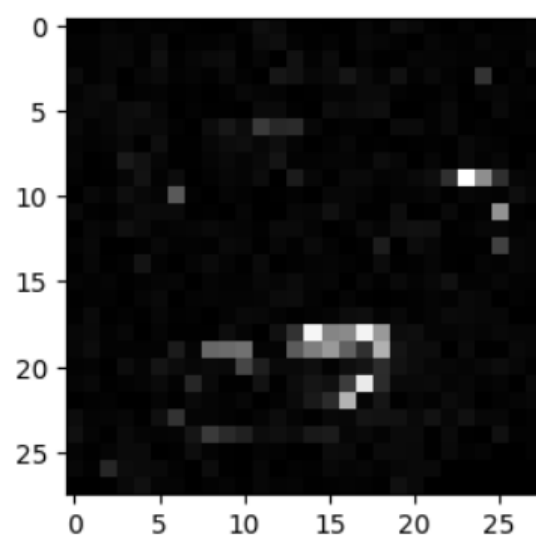

$4.5\text{e-}05$

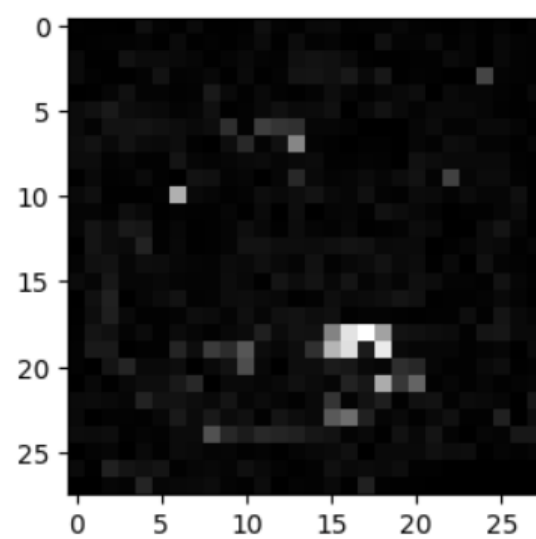

$4.0\text{e-}05$

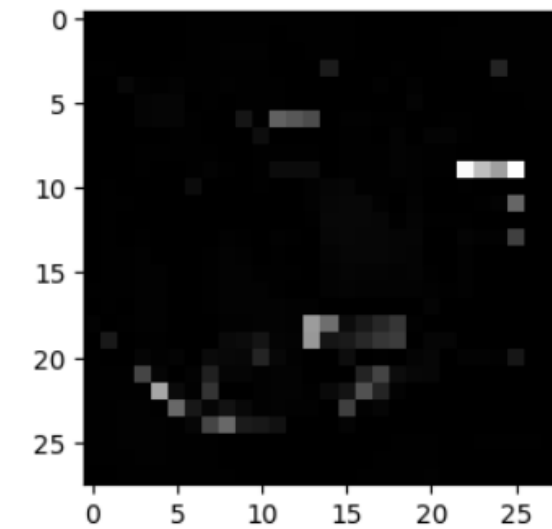

0.45

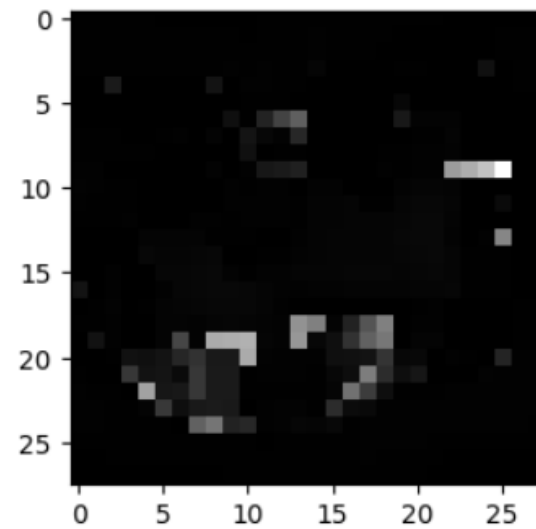

0.60

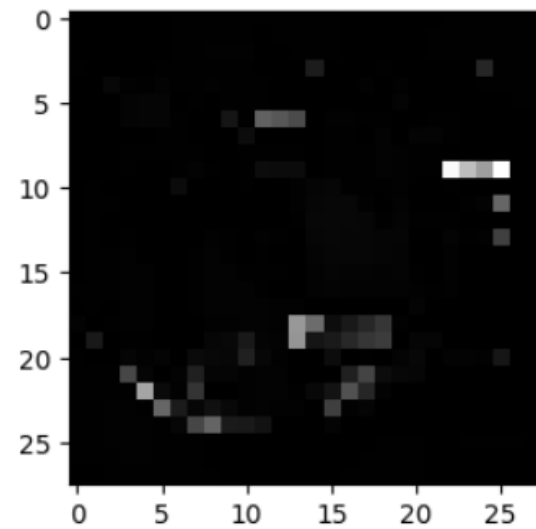

0.45

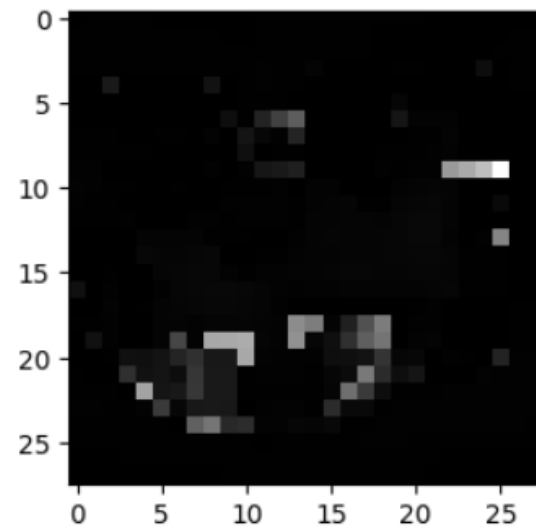

0.61

Supplement: supplementary_material [file attachment]

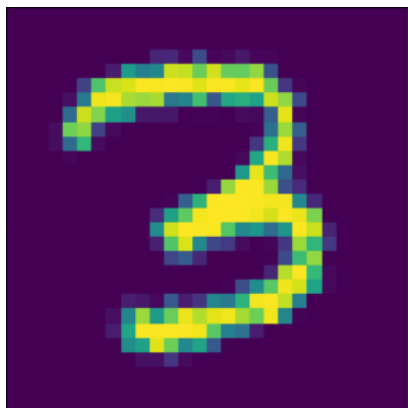

Reflect along the Y-axis

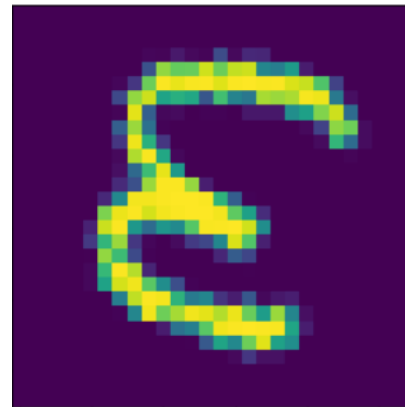

GE-ViT

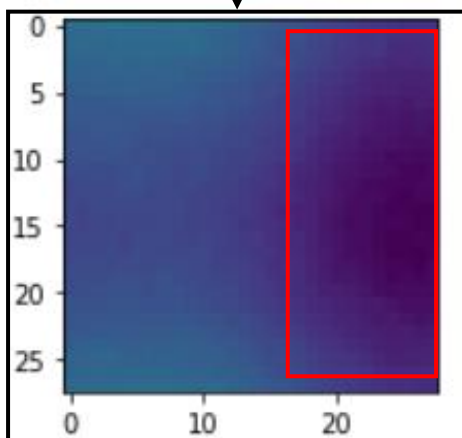

GE-ViT

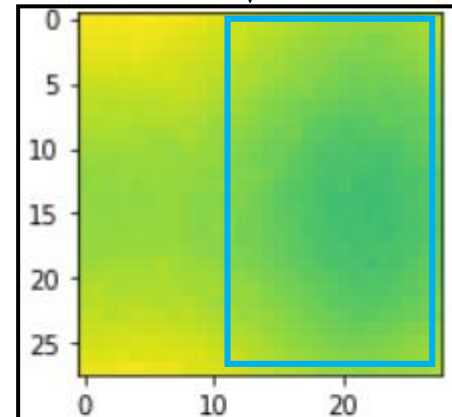

Reflection + Permutation

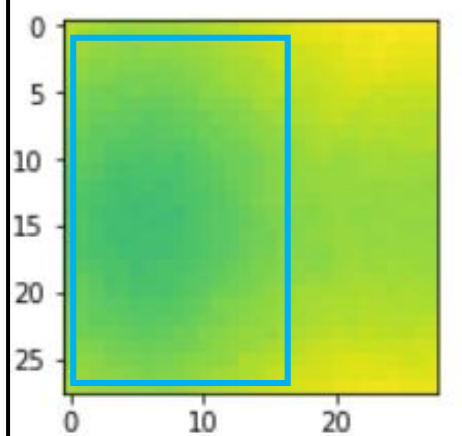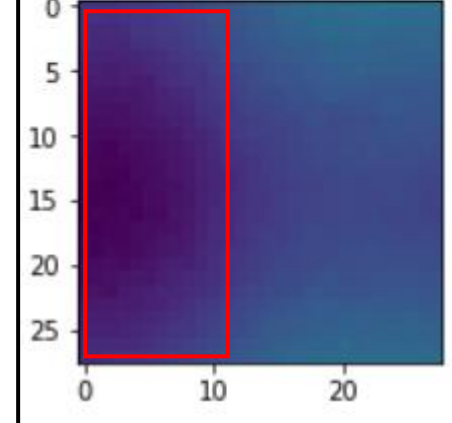

Supplement: supplementary_material [file attachment]
